# Supplementary material for: Surface Chemistry Studies of Emission and Thermal Behaviour of Developed Composites for Building Ceiling Materials
Source: Research Square preprint supplement (doi:10.21203/rs.3.rs-495989/v1), 2021-05-12
Supplement: Supplementary file 1 [file e0c0cda8dd13ef7ba65eeb4f.docx]

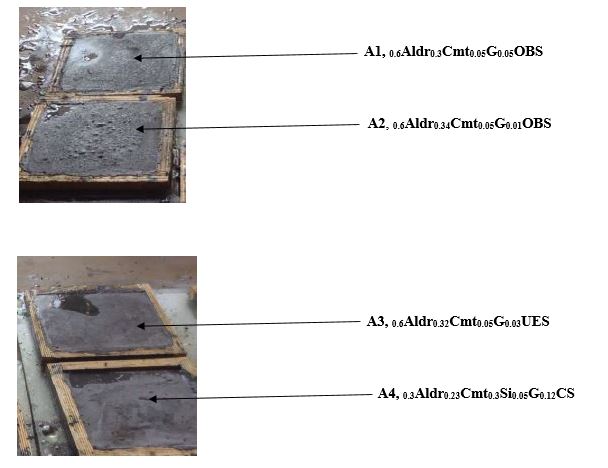
**Appendix A**

**Image of Developed Aluminium dross composite**

**Nomenclature for developed ceiling materials**

Aldr Aluminium Dross

Cmt Cement

G Graphite

Si Silicon

CS Coconut Shell

OBS Oil Bean Stalk
